# Supplementary material
Source: PubMed Central journal article supplement (PMC5108240)
Supplement: NIHMS825806-supplement-Supplemental.pdf [file NIHMS825806-supplement-Supplemental.pdf]

# Crystal structures of trimethoprim-resistant DfrA1 rationalize potent inhibition by propargyl-linked antifolates

Michael N. Lombardo, Narendran G-Dayanandan, Dennis L. Wright and Amy C. Anderson

Department of Pharmaceutical Sciences, University of Connecticut, 69 N. Eagleville Rd., Storrs, CT 06269

## Contents:

|                                                      |        |
|------------------------------------------------------|--------|
| Tabular HPLC data for compounds .....                | S1     |
| Copies of HPLC traces.....                           | S2-S7  |
| <sup>1</sup> H NMR and <sup>13</sup> C spectra ..... | S8-S19 |
| Omit density for crystal structures of DfrA1.....    | S20    |

## HPLC Purity

Purity analysis were performed with a reversed phase high performance liquid chromatography performed on a Shimadzu Prominence 20 instrument fitted with a Luna 5 $\mu$  C18(2) 100 Å column (5  $\mu$ M, 4.6 mm x 250 mm, Phenomenex) and using UV diode array detection at 254 nm. Two separate determinations - Method A : isocratic- 40% (v/v) MeCN/ 60% (v/v) 50 mM Potassium Phosphate, monobasic, pH=7.0 and Method B : isocratic- 80% (v/v) MeOH/ 20% (v/v) 50 mM Potassium Phosphate, monobasic, pH=7.0 were made to determine compound purity. Flow rate was 1.5 mL/min for Method A and 1.5 mL/min for Method B

Compounds were diluted in the HPLC grade methanol and filtered prior to analysis. Sample concentrations were 1 mg/ml and injection volume was 5 $\mu$ L.

| Compound | Method A             |      | Method B             |      |
|----------|----------------------|------|----------------------|------|
|          | t <sub>R</sub> (min) | %    | t <sub>R</sub> (min) | %    |
| 12       | 3.96                 | 98.7 | 5.89                 | 98.9 |
| 13       | 3.32                 | 98.7 | 5.11                 | 98.6 |
| 14       | 3.21                 | 98.5 | 4.84                 | 98.6 |
| 15       | 3.31                 | 99.8 | 5.01                 | 99.6 |
| 16       | 4.94                 | 99.0 | 7.04                 | 98.7 |
| 17       | 5.02                 | 99.5 | 7.07                 | 99.2 |

==== Shimadzu LCsolution Analysis Report ====

Acquired by : Admin  
 Sample Name : 2OMe Imidazole w Me  
 Sample ID : UCP-1084  
 Tray# : 1  
 Vial # : 2  
 Injection Volume : 5 uL  
 Data File Name : UCP-1084.lcd  
 Method File Name : Test.lcm  
 Batch File Name :  
 Report File Name : Default.lcr  
 Data Acquired : 8/5/2015 1:58:30 PM  
 Data Processed : 8/5/2015 2:19:21 PM

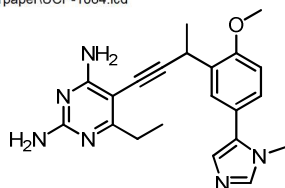

<Chromatogram>

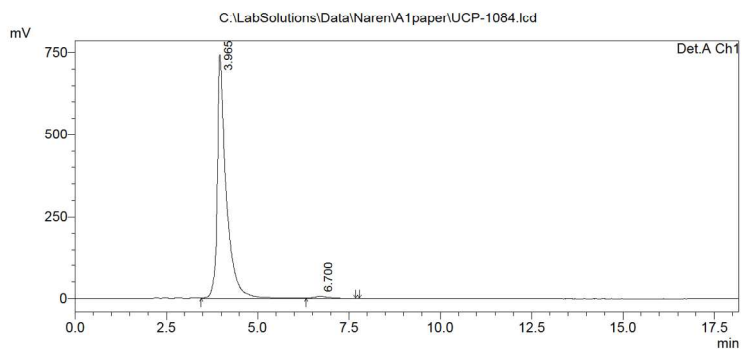

Detector A Ch1 254nm

| Peak# | Ret. Time | Area     | Height | Area %  | Height % |
|-------|-----------|----------|--------|---------|----------|
| 1     | 3.965     | 12797710 | 743165 | 98.832  | 99.186   |
| 2     | 6.700     | 151293   | 6100   | 1.168   | 0.814    |
| Total |           | 12949004 | 749265 | 100.000 | 100.000  |

==== Shimadzu LCsolution Analysis Report ====

Acquired by : Admin  
 Sample Name : 2OMe Imidazole w Me  
 Sample ID : UCP1084  
 Tray# : 1  
 Vial # : 2  
 Injection Volume : 5 uL  
 Data File Name : UCP-1084.lcd  
 Method File Name : Test.lcm  
 Batch File Name :  
 Report File Name : Default.lcr  
 Data Acquired : 8/5/2015 5:52:21 PM  
 Data Processed : 8/6/2015 9:35:08 AM

<Chromatogram>

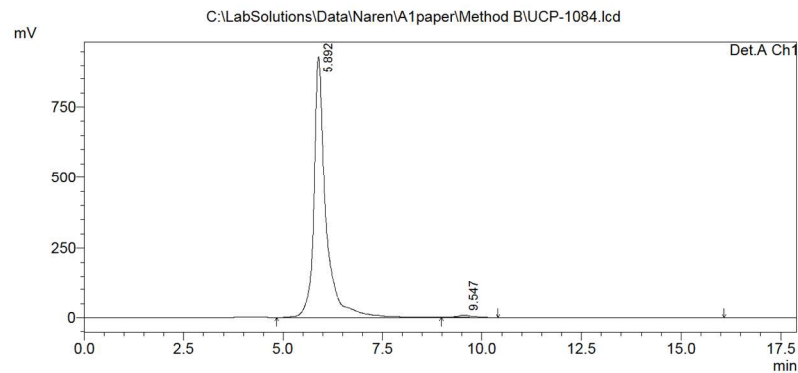

Detector A Ch1 254nm

| Peak# | Ret. Time | Area     | Height | Area %  | Height % |
|-------|-----------|----------|--------|---------|----------|
| 1     | 5.892     | 19771354 | 929348 | 98.988  | 99.195   |
| 2     | 9.547     | 202041   | 7544   | 1.012   | 0.805    |
| Total |           | 19973395 | 936891 | 100.000 | 100.000  |

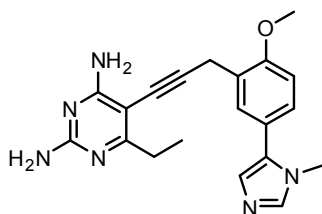

==== Shimadzu LCsolution Analysis Report ====

C:\LabSolutions\Data\Naren\A1\paper\UCP-1091.lcd  
 Acquired by : Admin  
 Sample Name : 2OMe Imidazole w-o Me  
 Sample ID : UCP-1091  
 Tray# : 1  
 Vail # : 3  
 Injection Volume : 5 uL  
 Data File Name : UCP-1091.lcd  
 Method File Name : Test.lcm  
 Batch File Name :  
 Report File Name : Default.lcr  
 Data Acquired : 8/5/2015 2:21:16 PM  
 Data Processed : 8/5/2015 3:04:45 PM

<Chromatogram>

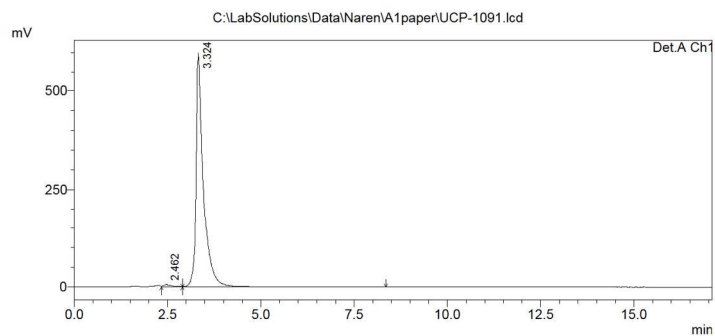

Detector A Ch1 254nm

| Peak# | Ret. Time | Area    | Height | Area %  | Height % |
|-------|-----------|---------|--------|---------|----------|
| 1     | 2.462     | 107169  | 6546   | 1.281   | 1.089    |
| 2     | 3.324     | 8257874 | 594396 | 98.719  | 98.911   |
| Total |           | 8365043 | 600942 | 100.000 | 100.000  |

==== Shimadzu LCsolution Analysis Report ====

C:\LabSolutions\Data\Naren\A1\paper\Method B\UCP-1091.lcd  
 Acquired by : Admin  
 Sample Name : 2OMe Imidazole w Me  
 Sample ID : UCP1091  
 Tray# : 1  
 Vail # : 3  
 Injection Volume : 5 uL  
 Data File Name : UCP-1091.lcd  
 Method File Name : Test.lcm  
 Batch File Name :  
 Report File Name : Default.lcr  
 Data Acquired : 8/6/2015 9:36:53 AM  
 Data Processed : 8/6/2015 10:25:26 AM

<Chromatogram>

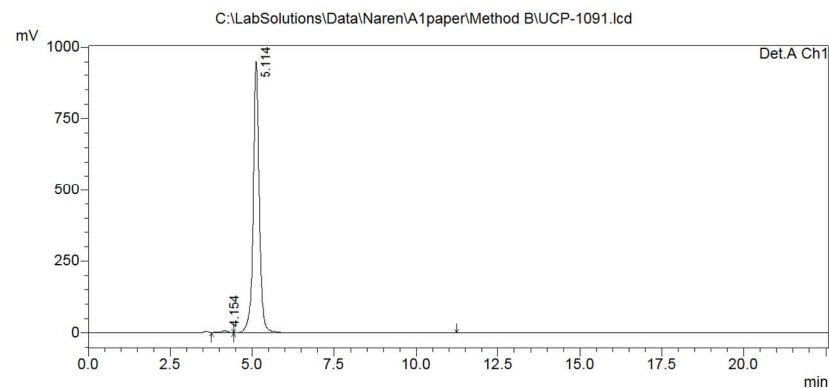

Detector A Ch1 254nm

| Peak# | Ret. Time | Area     | Height | Area %  | Height % |
|-------|-----------|----------|--------|---------|----------|
| 1     | 4.154     | 165231   | 8362   | 1.312   | 0.872    |
| 2     | 5.114     | 12429651 | 950593 | 98.688  | 99.128   |
| Total |           | 12594882 | 958955 | 100.000 | 100.000  |

==== Shimadzu LCsolution Analysis Report ====

C:\LabSolutions\Data\Naren\A1paper\Method B\UCP-1092.lcd  
 Acquired by : Admin  
 Sample Name : Pyrimidine-H Imidazole  
 Sample ID : UCP1092  
 Tray# : 1  
 Vial # : 1  
 Injection Volume : 5 uL  
 Data File Name : UCP-1092.lcd  
 Method File Name : Test.lcm  
 Batch File Name :  
 Report File Name : Default.lcr  
 Data Acquired : 8/5/2015 5:32:22 PM  
 Data Processed : 8/6/2015 9:35:02 AM

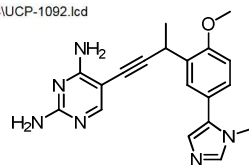

Detector A Ch1 254nm

| Peak# | Ret. Time | Area     | Height  | Area %  | Height % |
|-------|-----------|----------|---------|---------|----------|
| 1     | 3.821     | 246981   | 14215   | 1.309   | 1.371    |
| 2     | 4.840     | 18615683 | 1022416 | 98.691  | 98.629   |
| Total |           | 18862663 | 1036632 | 100.000 | 100.000  |

8/6/2015 11:28:07 1 / 2

<Chromatogram>

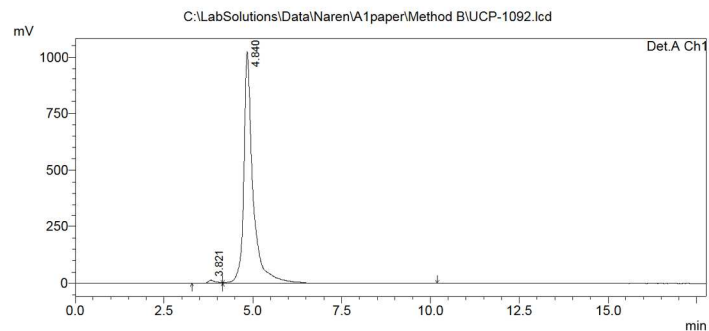

Detector A Ch1 254nm

| Peak# | Ret. Time | Area     | Height | Area %  | Height % |
|-------|-----------|----------|--------|---------|----------|
| 1     | 2.457     | 180482   | 11187  | 1.499   | 1.279    |
| 2     | 3.215     | 11861230 | 863408 | 98.501  | 98.721   |
| Total |           | 12041712 | 874596 | 100.000 | 100.000  |

==== Shimadzu LCsolution Analysis Report ====

C:\LabSolutions\Data\Naren\A1paper\UCP1092.lcd  
 Acquired by : Admin  
 Sample Name : Pyrimidine-H imidazole  
 Sample ID : UCP1092  
 Tray# : 1  
 Vial # : 1  
 Injection Volume : 5 uL  
 Data File Name : UCP1092.lcd  
 Method File Name : Test.lcm  
 Batch File Name :  
 Report File Name : Default.lcr  
 Data Acquired : 8/5/2015 1:13:38 PM  
 Data Processed : 8/5/2015 2:19:06 PM

<Chromatogram>

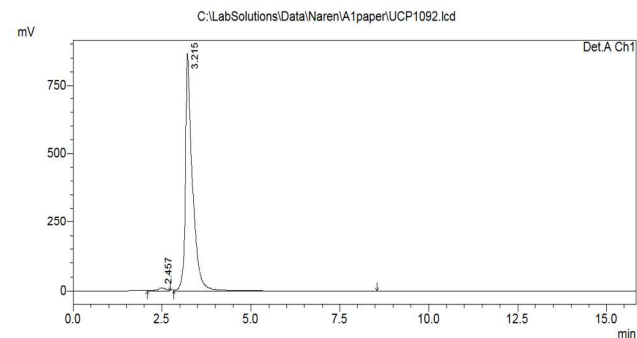

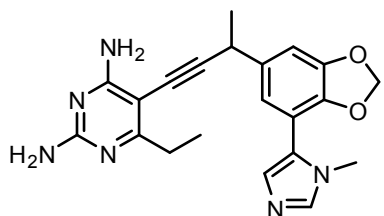

==== Shimadzu LCsolution Analysis Report ====

C:\LabSolutions\Data\Naren\A1paper\UCP-1102.lcd  
 Acquired by : Admin  
 Sample Name : diox Imidazole w Me  
 Sample ID : UCP-1102  
 Tray# : 1  
 Vial # : 4  
 Injection Volume : 5 uL  
 Data File Name : UCP-1102.lcd  
 Method File Name : Test.lcm  
 Batch File Name :  
 Report File Name : Default.lcr  
 Data Acquired : 8/5/2015 2:44:30 PM  
 Data Processed : 8/5/2015 3:30:37 PM

<Chromatogram>

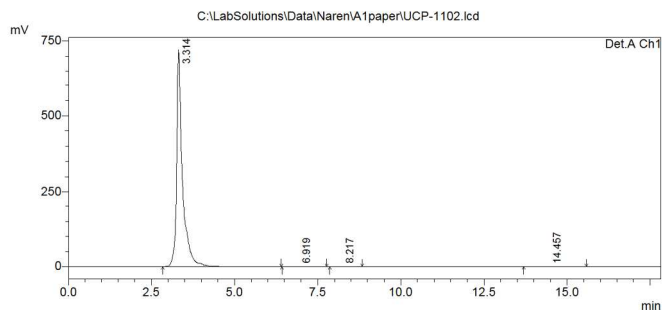

PeakTable

| Peak# | Ret. Time | Area    | Height | Area %  | Height % |
|-------|-----------|---------|--------|---------|----------|
| 1     | 3.314     | 8851122 | 718507 | 99.808  | 99.940   |
| 2     | 6.919     | 6627    | 182    | 0.075   | 0.025    |
| 3     | 8.217     | 2835    | 92     | 0.032   | 0.013    |
| 4     | 14.457    | 7547    | 161    | 0.085   | 0.022    |
| Total |           | 8868130 | 718942 | 100.000 | 100.000  |

==== Shimadzu LCsolution Analysis Report ====

C:\LabSolutions\Data\Naren\A1paper\Method BIUCP1102.lcd  
 Acquired by : Admin  
 Sample Name : diox Imidazole w Me  
 Sample ID : UCP1102  
 Tray# : 1  
 Vial # : 4  
 Injection Volume : 5 uL  
 Data File Name : UCP1102.lcd  
 Method File Name : Test.lcm  
 Batch File Name :  
 Report File Name : Default.lcr  
 Data Acquired : 8/6/2015 10:02:16 AM  
 Data Processed : 8/6/2015 10:57:05 AM

<Chromatogram>

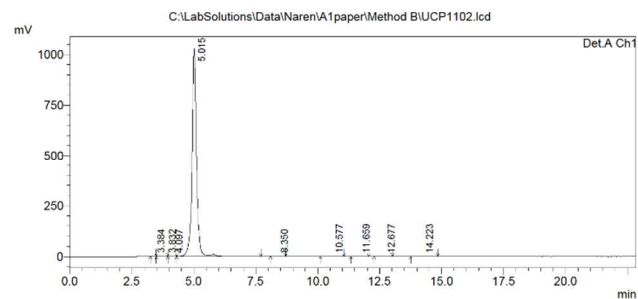

Detector A Ch1 254nm

| Peak# | Ret. Time | Area     | Height  | Area %  | Height % |
|-------|-----------|----------|---------|---------|----------|
| 1     | 3.384     | 927      | 140     | 0.007   | 0.014    |
| 2     | 3.832     | 10339    | 686     | 0.078   | 0.067    |
| 3     | 4.097     | 7700     | 875     | 0.058   | 0.085    |
| 4     | 5.015     | 13162759 | 1027668 | 99.628  | 99.692   |
| 5     | 8.350     | 8120     | 508     | 0.061   | 0.049    |
| 6     | 10.577    | 8257     | 356     | 0.062   | 0.035    |
| 7     | 11.659    | 3449     | 171     | 0.026   | 0.017    |
| 8     | 12.677    | 2339     | 116     | 0.018   | 0.011    |
| 9     | 14.223    | 7963     | 318     | 0.060   | 0.031    |
| Total |           | 13211853 | 1030838 | 100.000 | 100.000  |

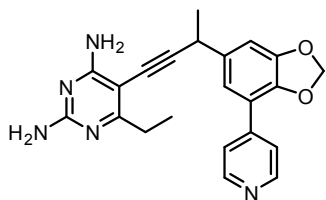

==== Shimadzu LCsolution Analysis Report ====

C:\LabSolutions\Data\Naren\A1paper\UCP-1038.lcd  
 Acquired by : Admin  
 Sample Name : Pyrimidine H imidazole  
 Sample ID : UCP-1038  
 Tray# : 1  
 Vail # : 5  
 Injection Volume : 5 uL  
 Data File Name : UCP-1038.lcd  
 Method File Name : Test.lcm  
 Batch File Name :  
 Report File Name : Default.lcr  
 Data Acquired : 8/5/2015 1:32:16 PM  
 Data Processed : 8/5/2015 2:10:17 PM

<Chromatogram>

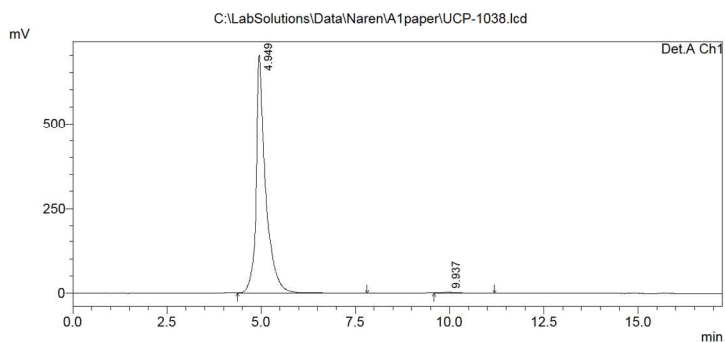

Detector A Ch1 254nm

| Peak# | Ret. Time | Area     | Height | Area %  | Height % |
|-------|-----------|----------|--------|---------|----------|
| 1     | 4.949     | 12371740 | 698305 | 99.067  | 99.480   |
| 2     | 9.937     | 116540   | 3649   | 0.933   | 0.520    |
| Total |           | 12488280 | 701954 | 100.000 | 100.000  |

==== Shimadzu LCsolution Analysis Report ====

C:\LabSolutions\Data\Naren\A1paper\Method BU\UCP1038.lcd  
 Acquired by : Admin  
 Sample Name : diox Imidazole w Me  
 Sample ID : UCP1038  
 Tray# : 1  
 Vail # : 5  
 Injection Volume : 5 uL  
 Data File Name : UCP1038.lcd  
 Method File Name : Test.lcm  
 Batch File Name :  
 Report File Name : Default.lcr  
 Data Acquired : 8/6/2015 10:32:38 AM  
 Data Processed : 8/6/2015 11:03:33 AM

<Chromatogram>

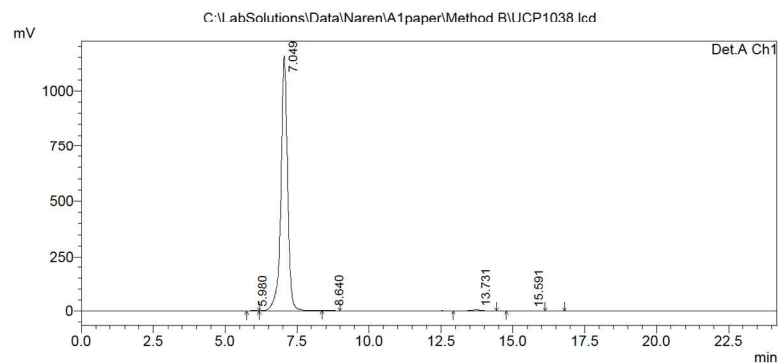

Detector A Ch1 254nm

| Peak# | Ret. Time | Area     | Height  | Area %  | Height % |
|-------|-----------|----------|---------|---------|----------|
| 1     | 5.980     | 37681    | 2823    | 0.196   | 0.242    |
| 2     | 7.049     | 19005034 | 1157313 | 98.763  | 99.049   |
| 3     | 8.640     | 35931    | 2319    | 0.187   | 0.199    |
| 4     | 13.731    | 154183   | 5713    | 0.801   | 0.489    |
| 5     | 15.591    | 10167    | 260     | 0.053   | 0.022    |
| Total |           | 19242996 | 1168429 | 100.000 | 100.000  |

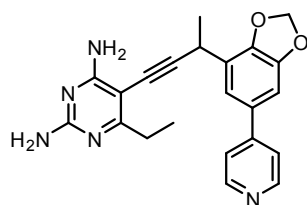

==== Shimadzu LCsolution Analysis Report ====

C:\LabSolutions\Data\Naren\A1\paper\UCP-1037.lcd  
 Acquired by : Admin  
 Sample Name : diox Pyridine w Me  
 Sample ID : UCP-1037  
 Tray# : 1  
 Vial # : 6  
 Injection Volume : 5 uL  
 Data File Name : UCP-1037.lcd  
 Method File Name : Test.lcm  
 Batch File Name :  
 Report File Name : Default.lcr  
 Data Acquired : 8/5/2015 3:04:05 PM  
 Data Processed : 8/5/2015 3:31:05 PM

<Chromatogram>

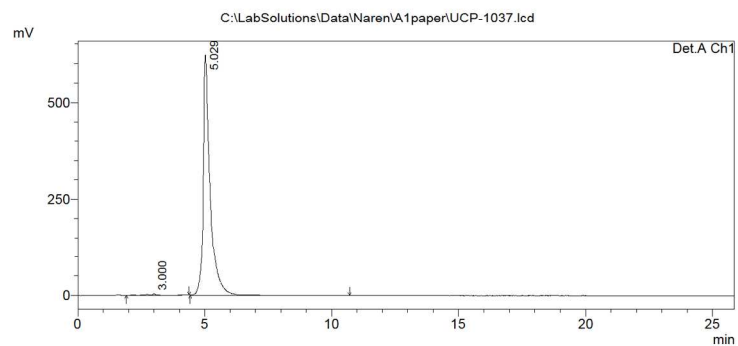

PeakTable

| Peak# | Ret. Time | Area     | Height | Area %  | Height % |
|-------|-----------|----------|--------|---------|----------|
| 1     | 3.000     | 52560    | 3513   | 0.441   | 0.562    |
| 2     | 5.029     | 11856569 | 621636 | 99.559  | 99.438   |
| Total |           | 11909129 | 625149 | 100.000 | 100.000  |

==== Shimadzu LCsolution Analysis Report ====

C:\LabSolutions\Data\Naren\A1\paper\Method BIUCP1037.lcd  
 Acquired by : Admin  
 Sample Name : diox Pyridine w Me  
 Sample ID : UCP1037  
 Tray# : 1  
 Vial # : 6  
 Injection Volume : 5 uL  
 Data File Name : UCP1037.lcd  
 Method File Name : Test.lcm  
 Batch File Name :  
 Report File Name : Default.lcr  
 Data Acquired : 8/6/2015 10:59:55 AM  
 Data Processed : 8/6/2015 11:26:38 AM

<Chromatogram>

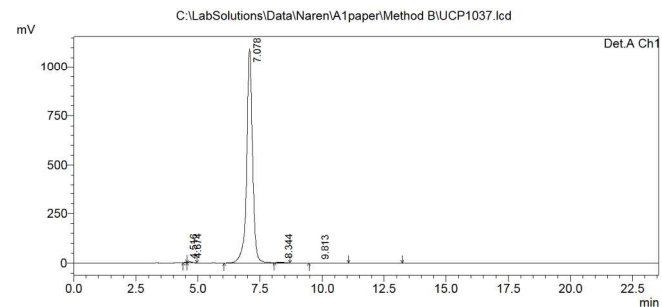

Detector A Ch1 254nm

| Peak# | Ret. Time | Area     | Height  | Area %  | Height % |
|-------|-----------|----------|---------|---------|----------|
| 1     | 4.516     | 20225    | 3088    | 0.112   | 0.279    |
| 2     | 4.674     | 69112    | 6267    | 0.381   | 0.567    |
| 3     | 7.078     | 17993484 | 1092406 | 99.203  | 98.823   |
| 4     | 8.344     | 48132    | 3140    | 0.265   | 0.284    |
| 5     | 9.813     | 7174     | 516     | 0.040   | 0.047    |
| Total |           | 18138127 | 1105418 | 100.000 | 100.000  |



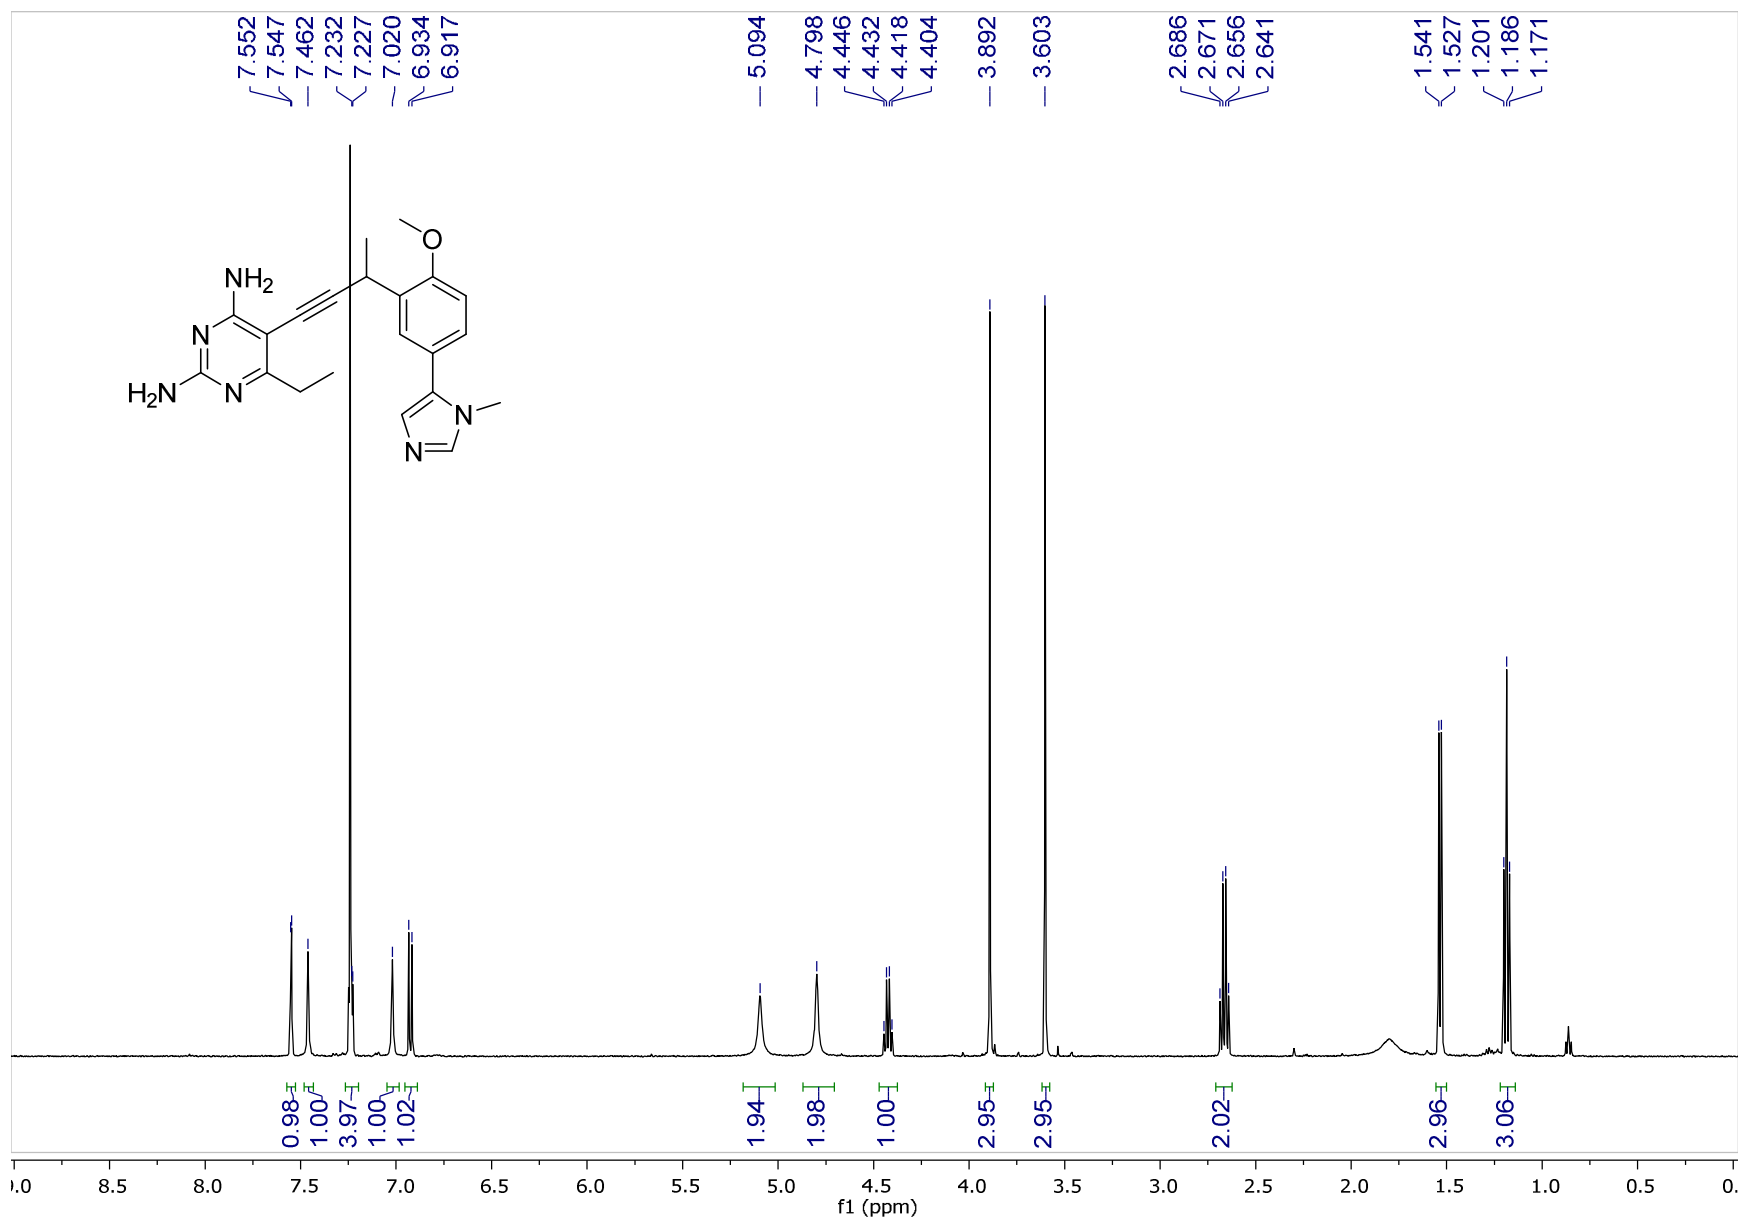

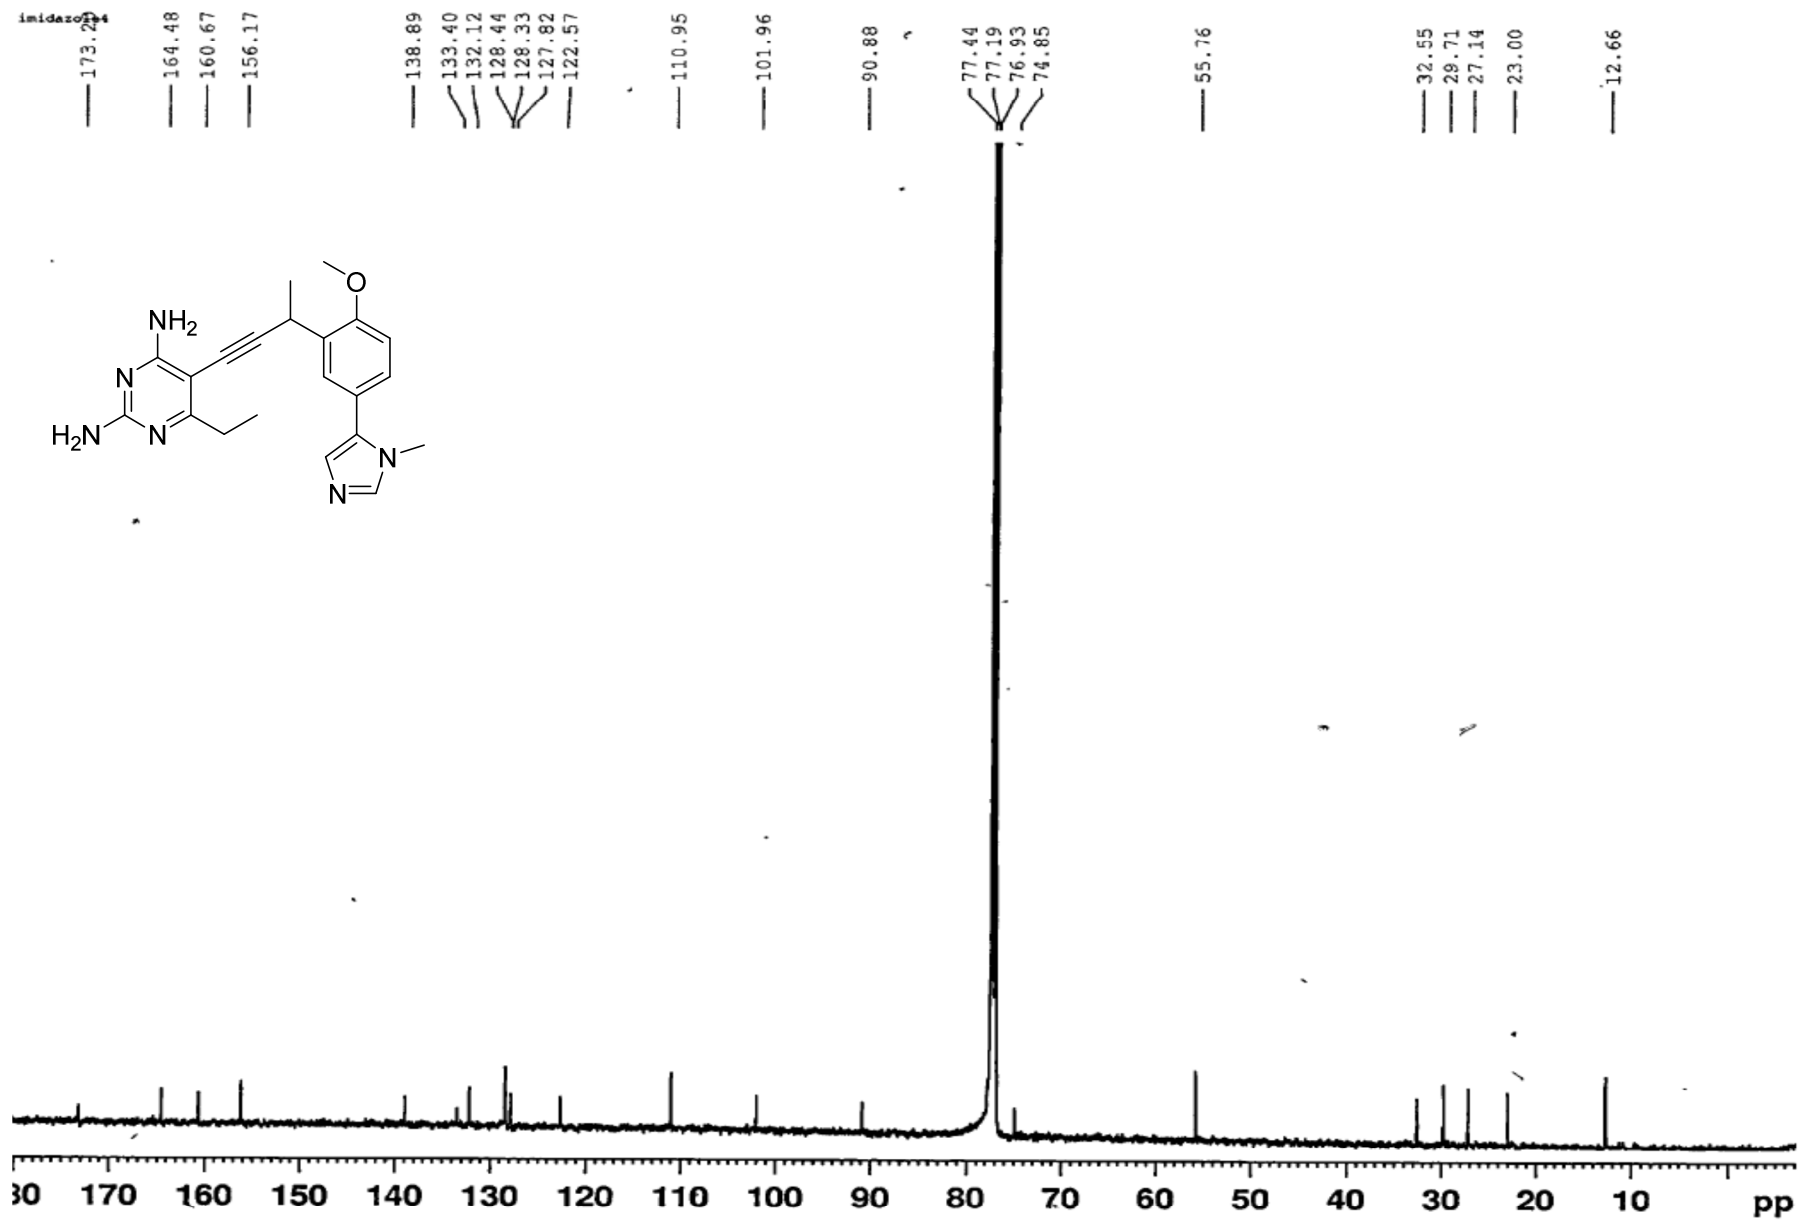

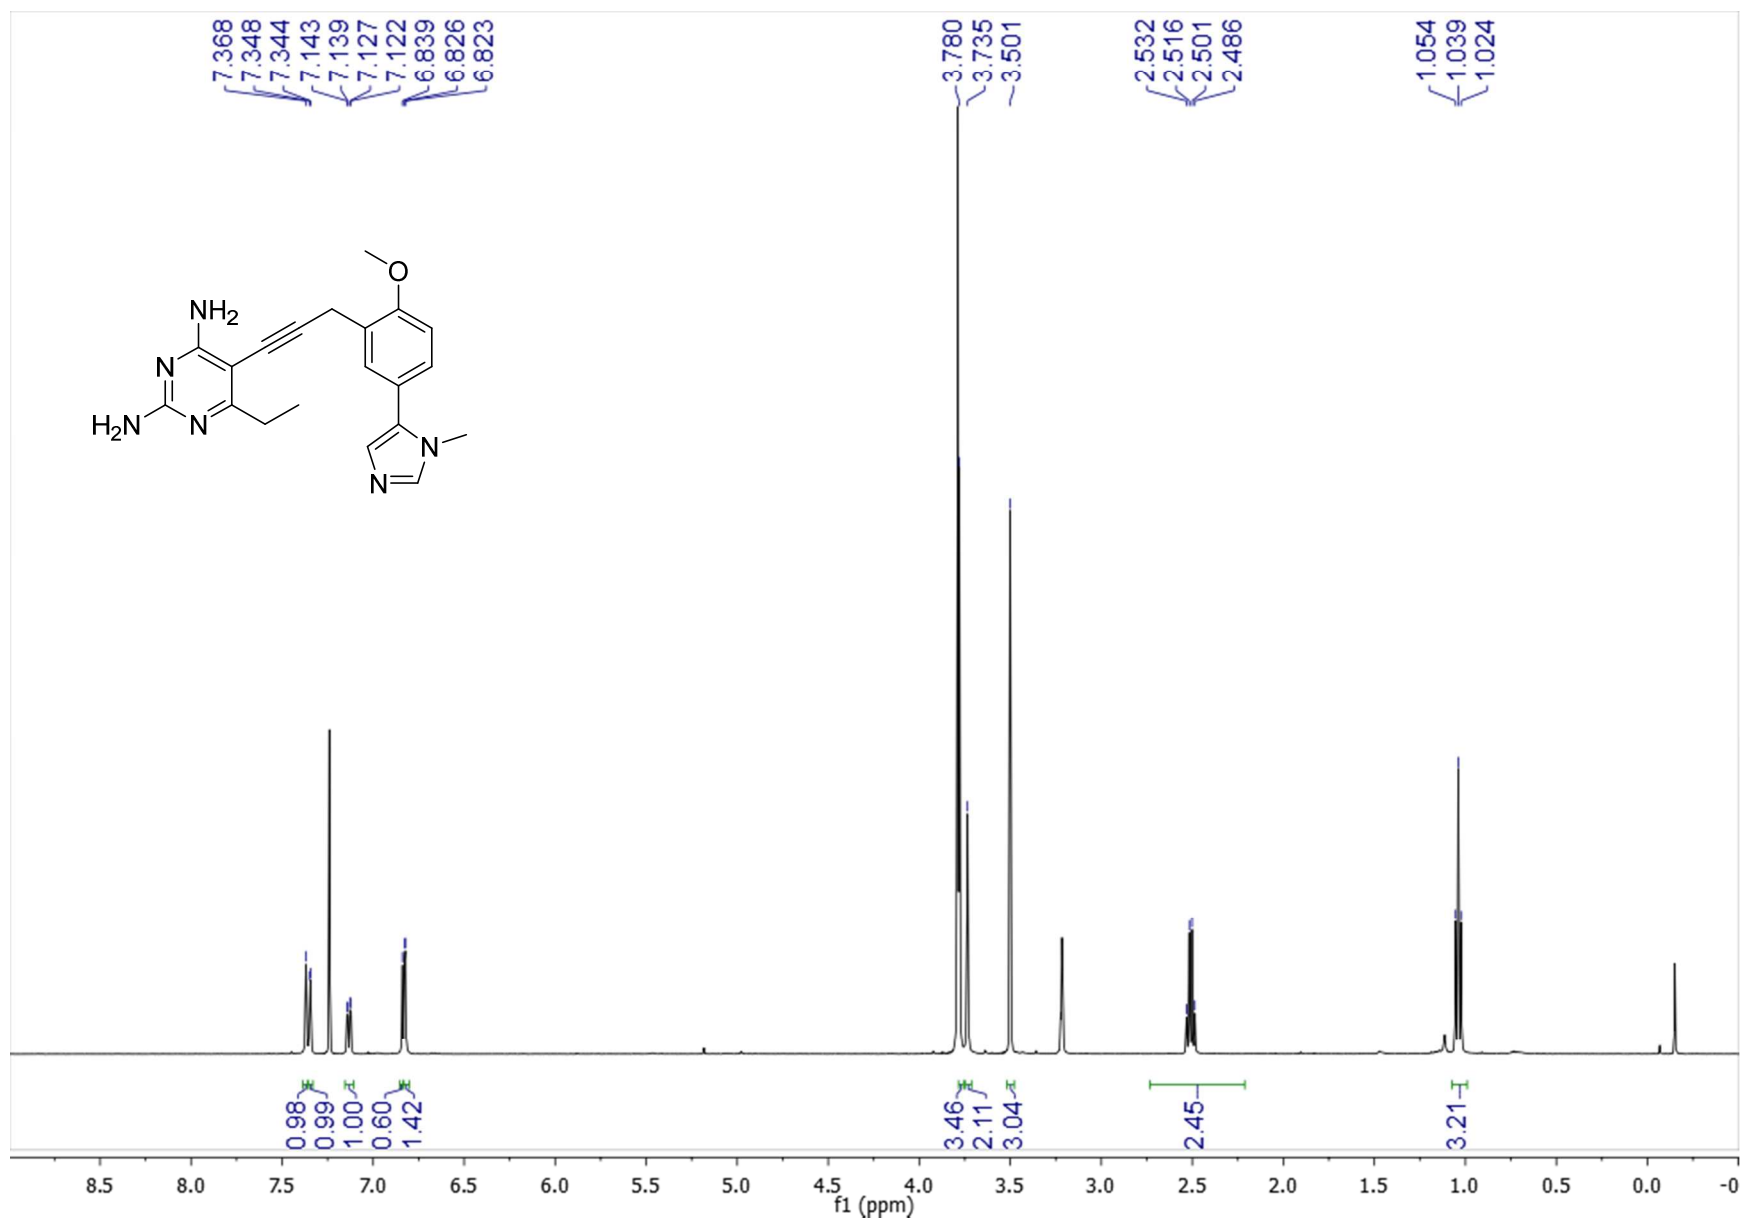

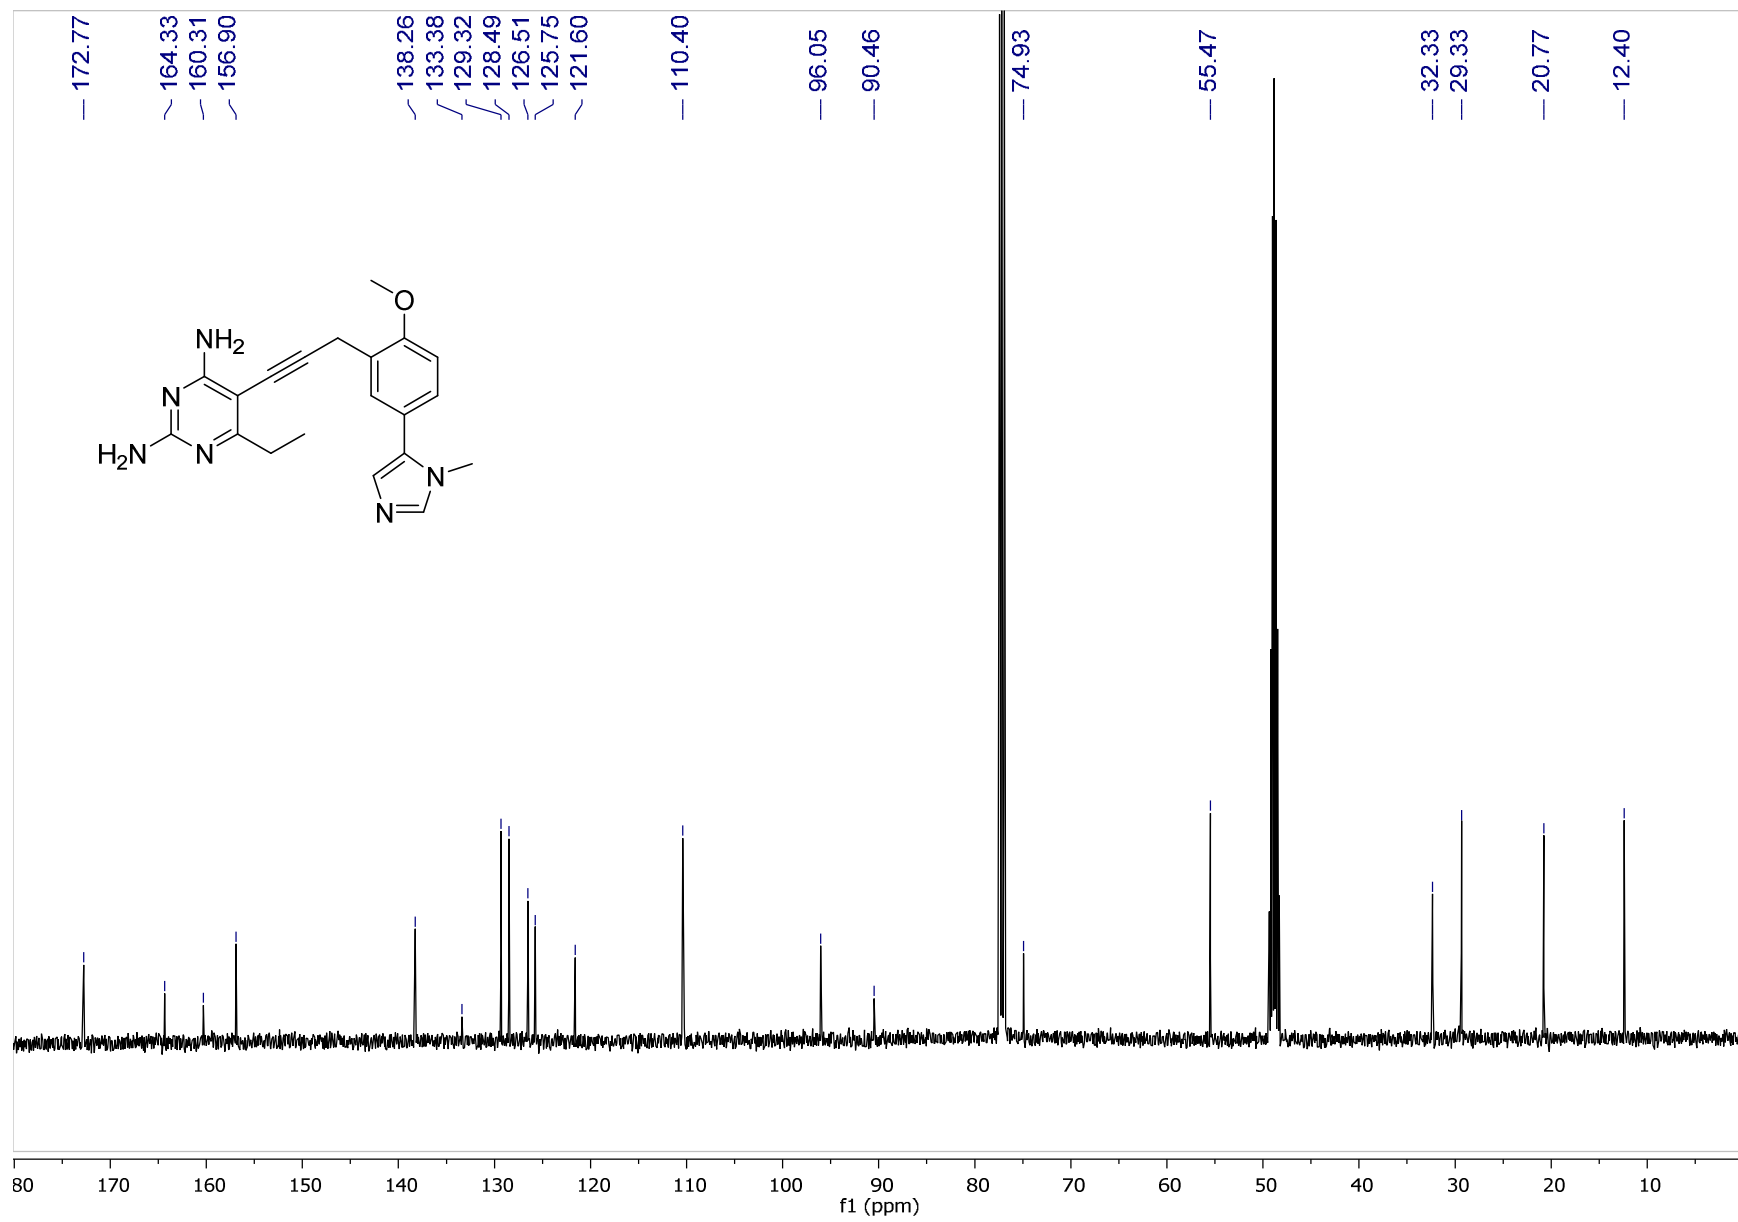

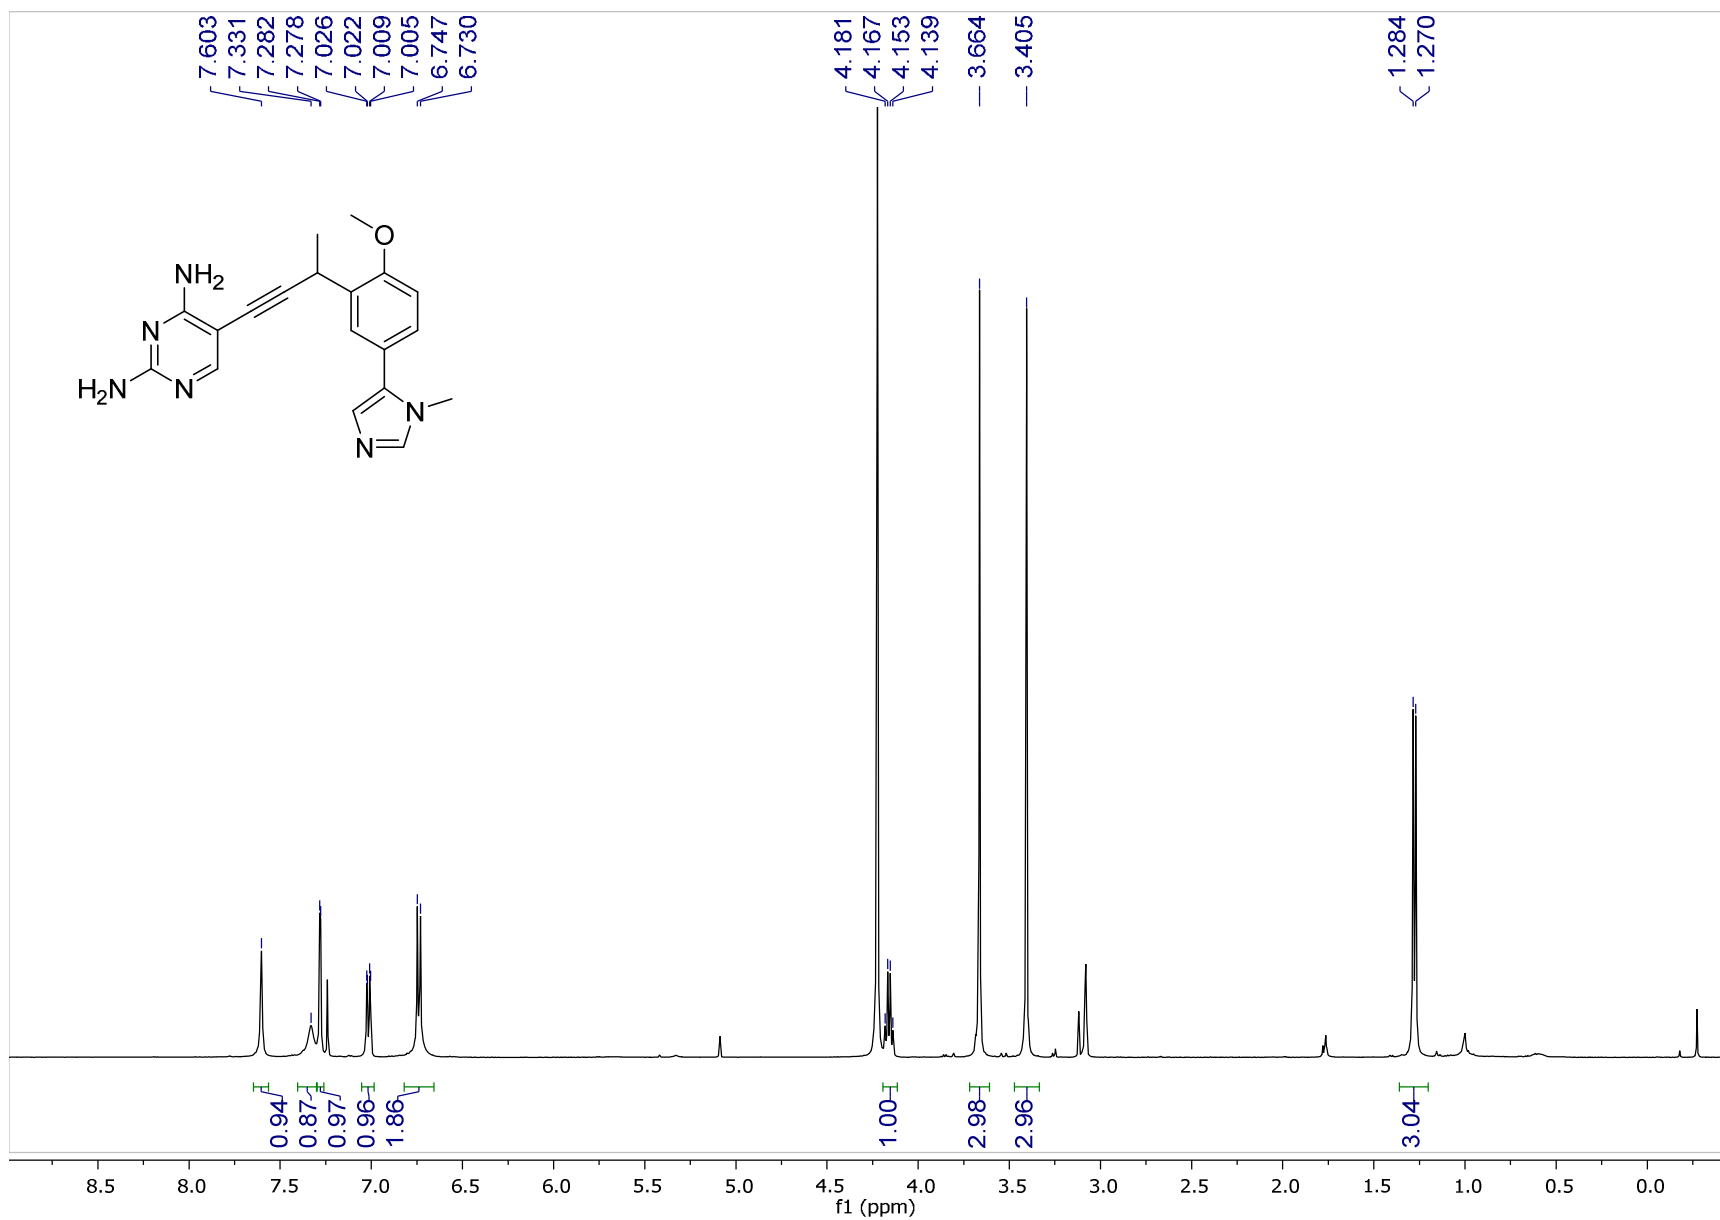

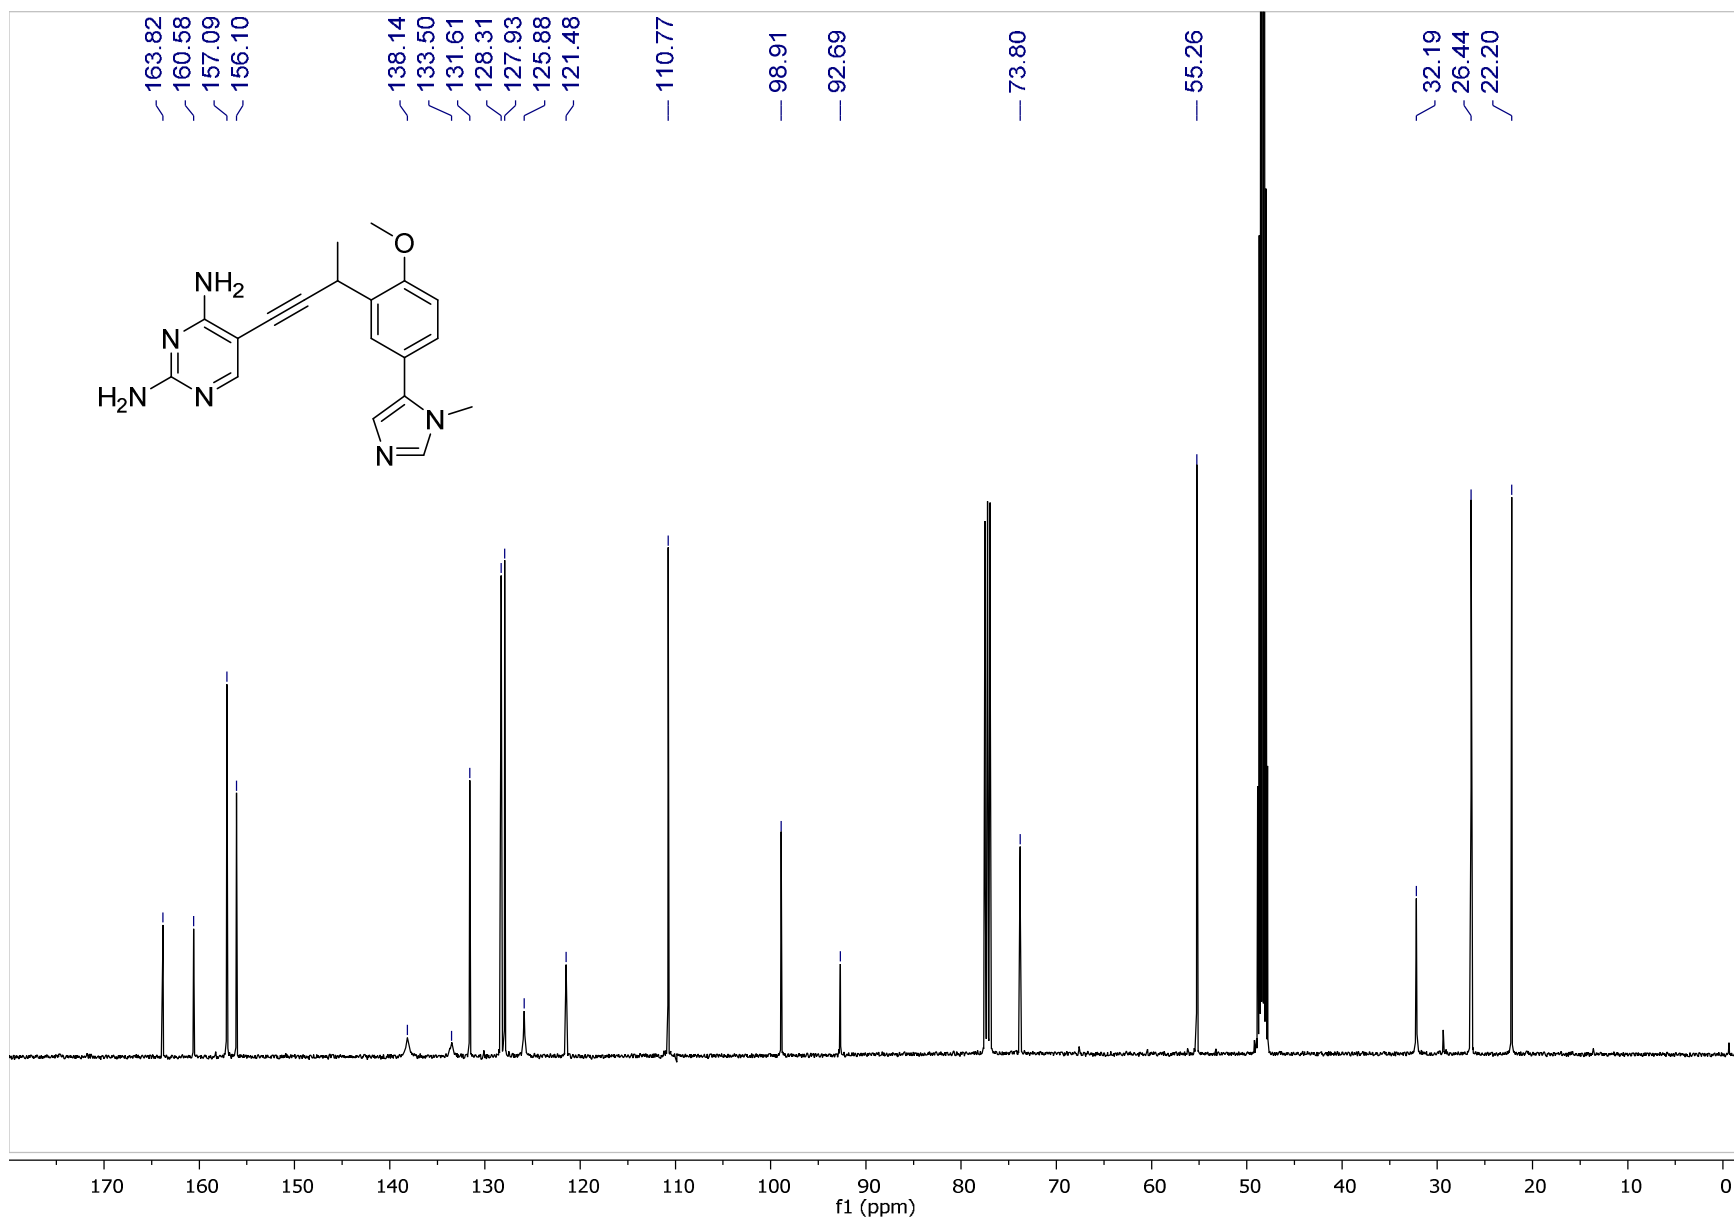

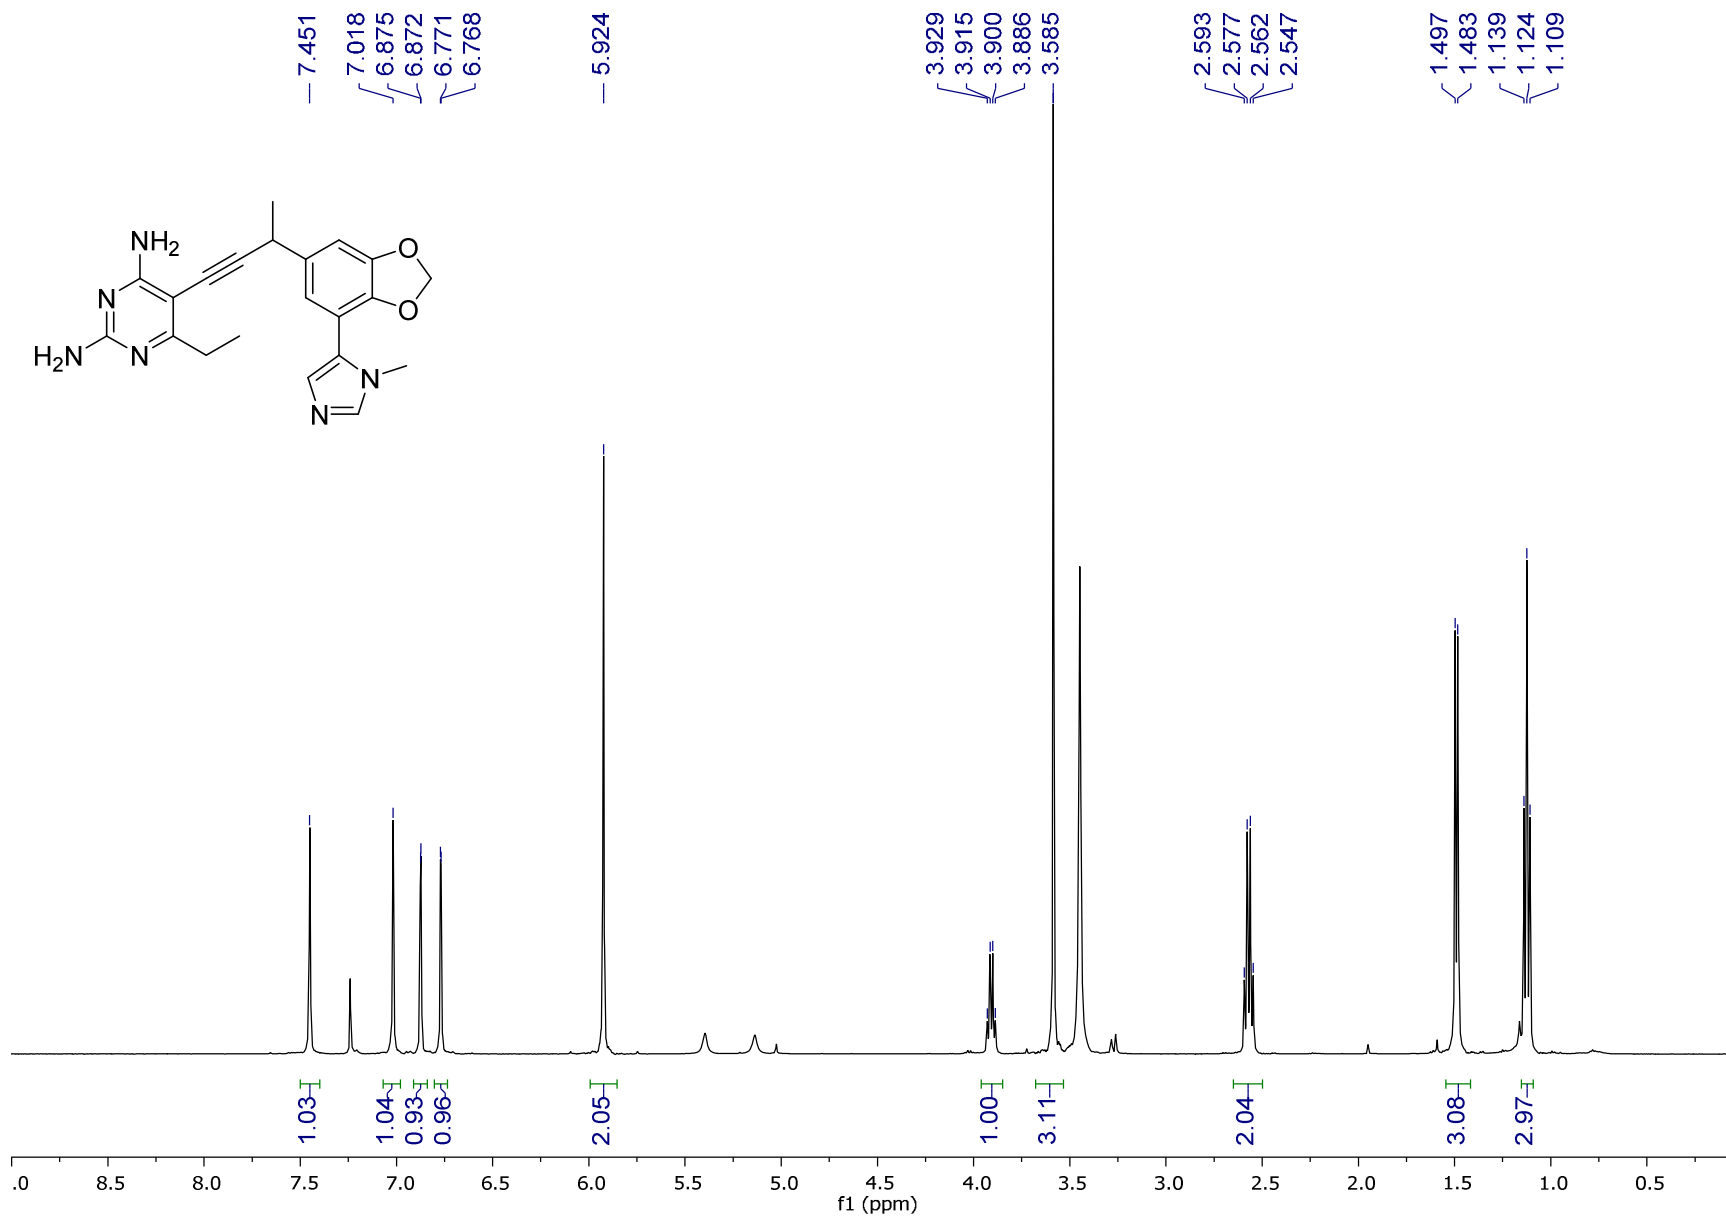

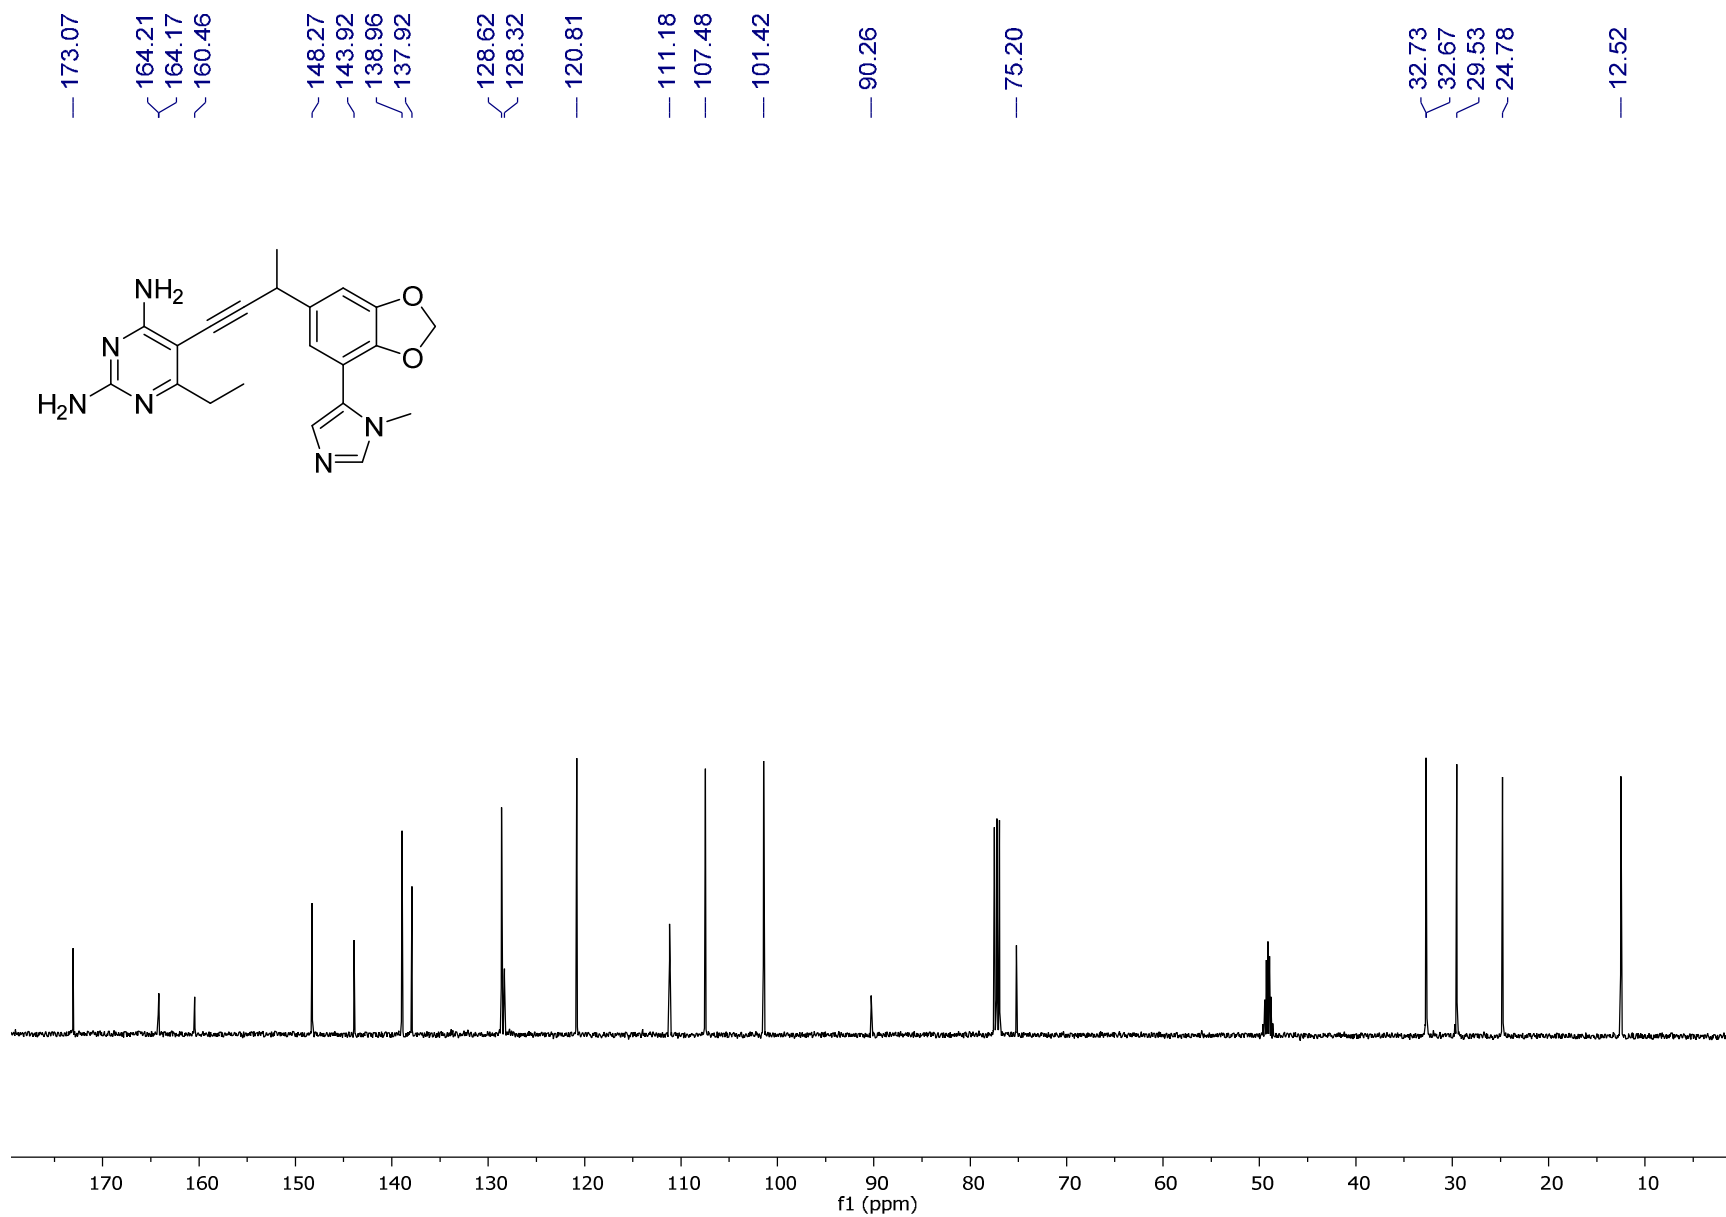



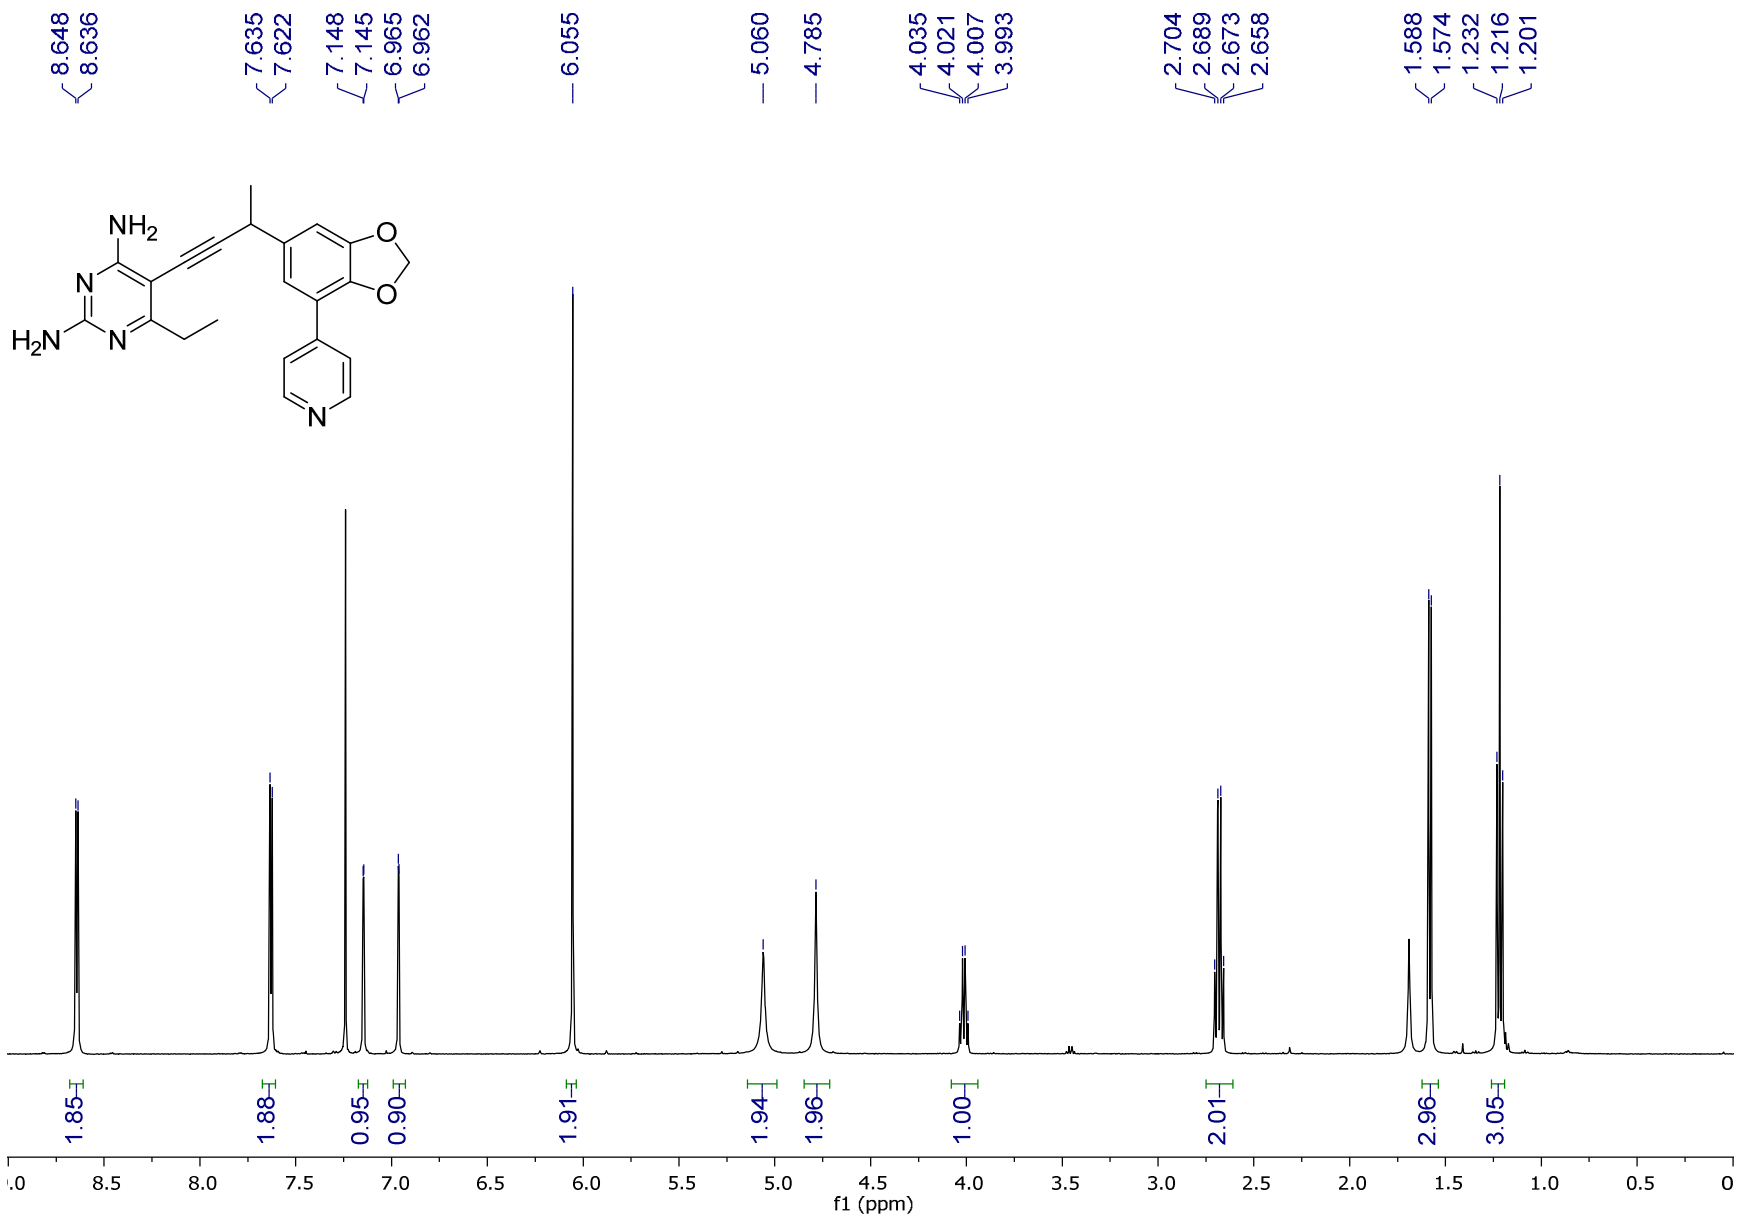

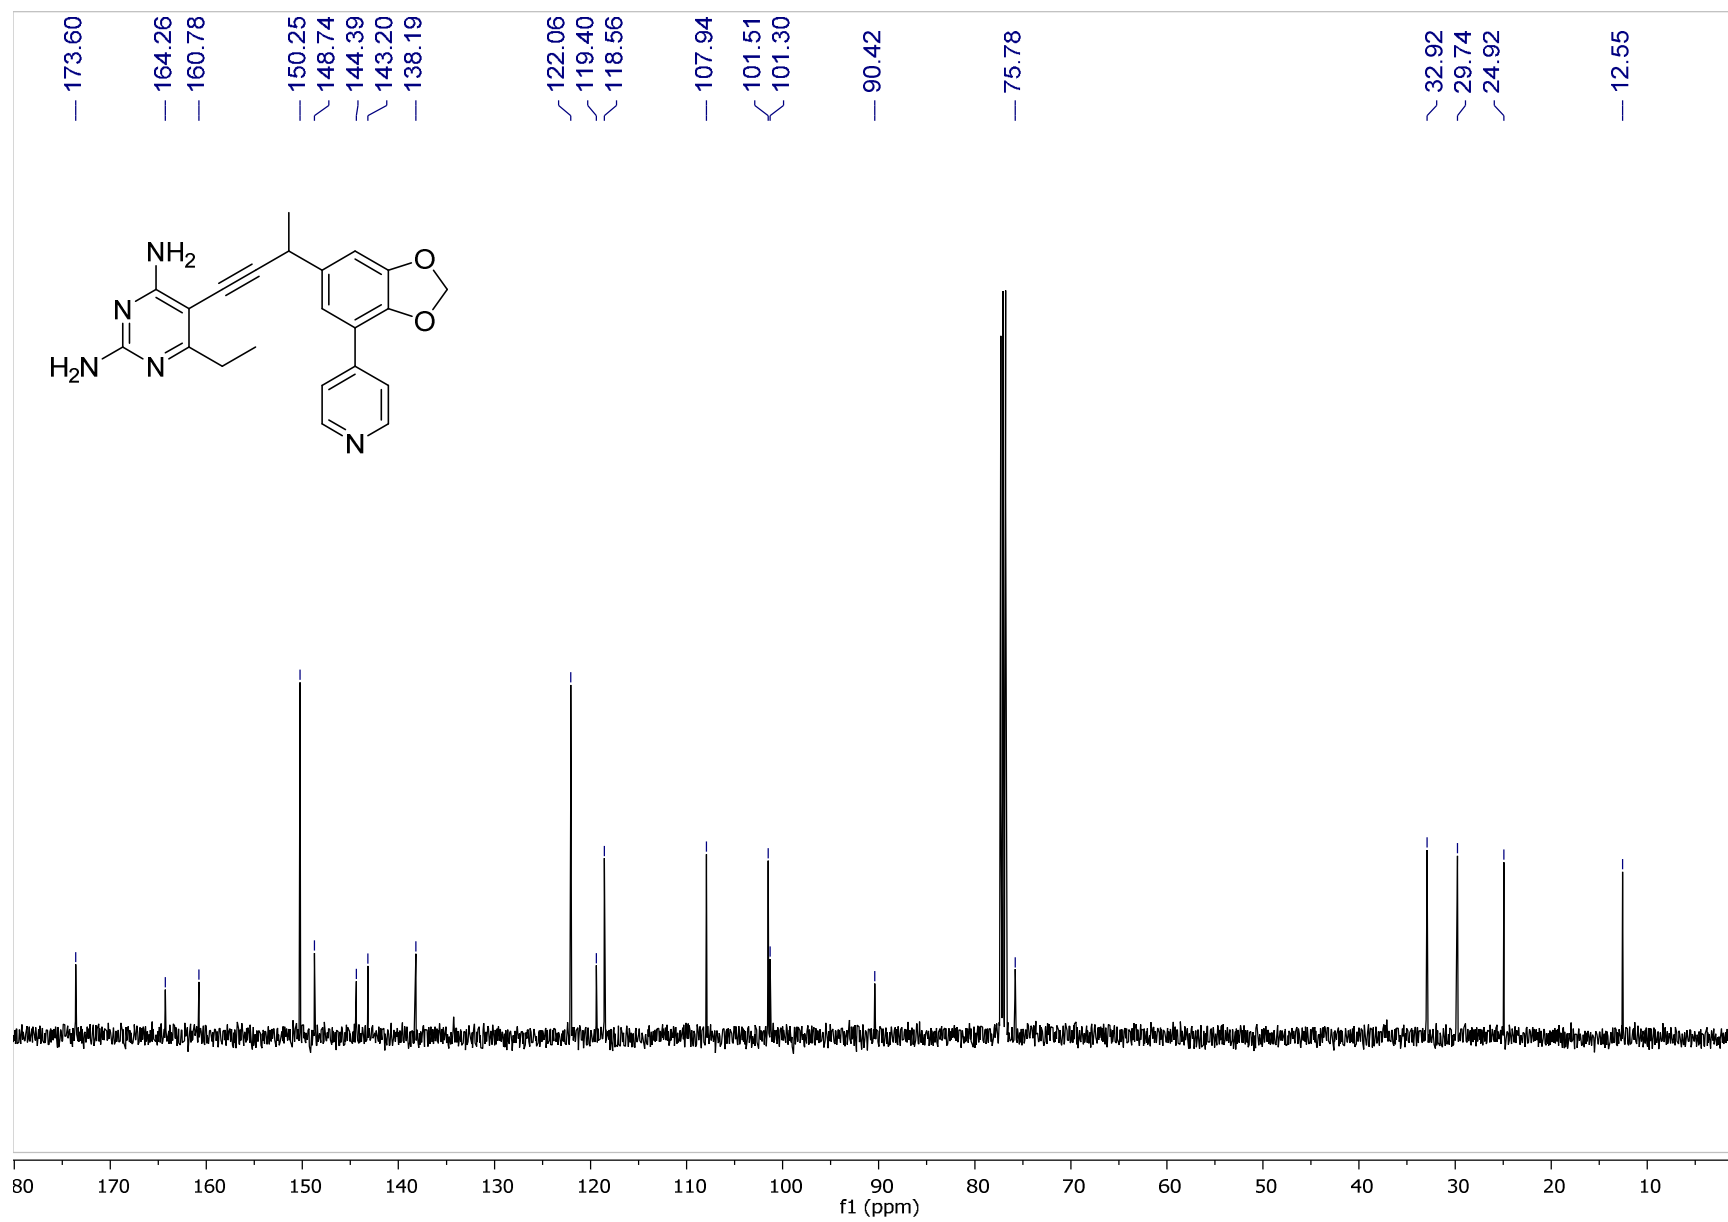

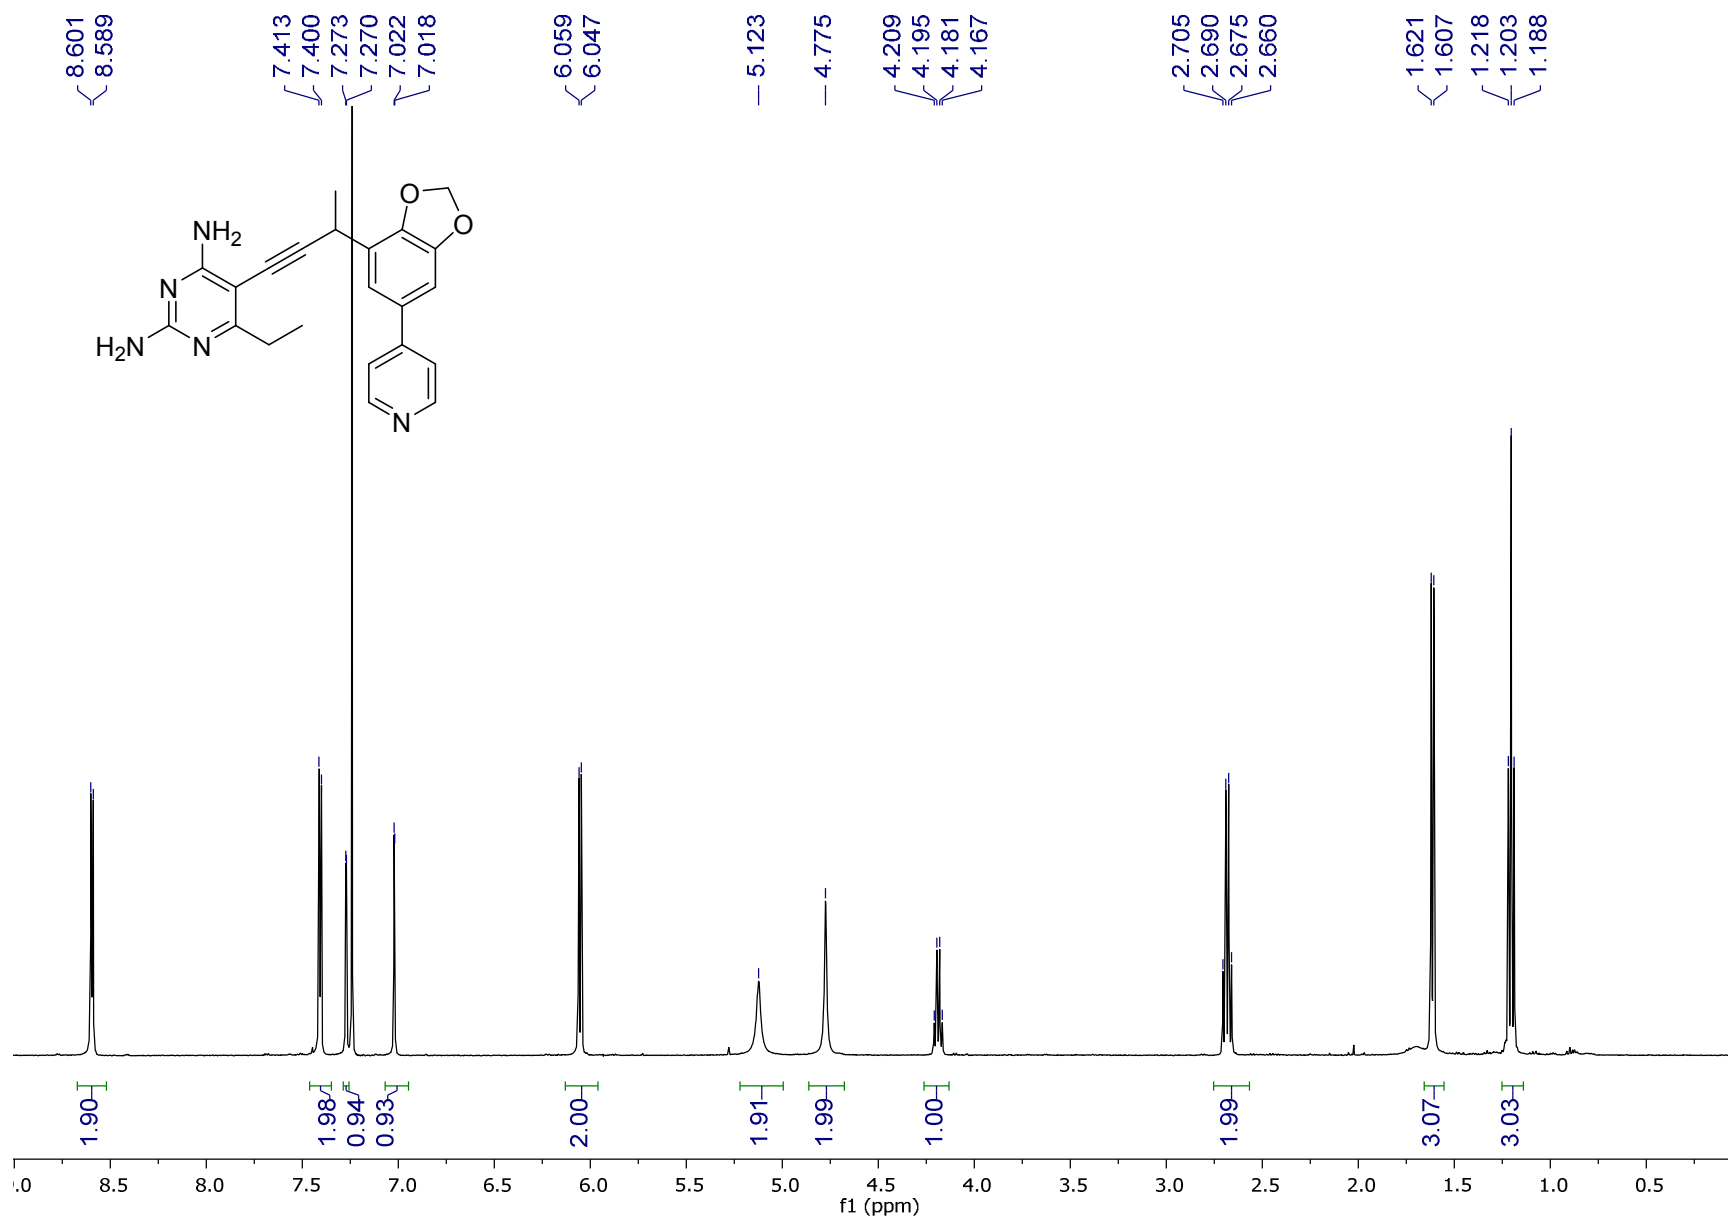

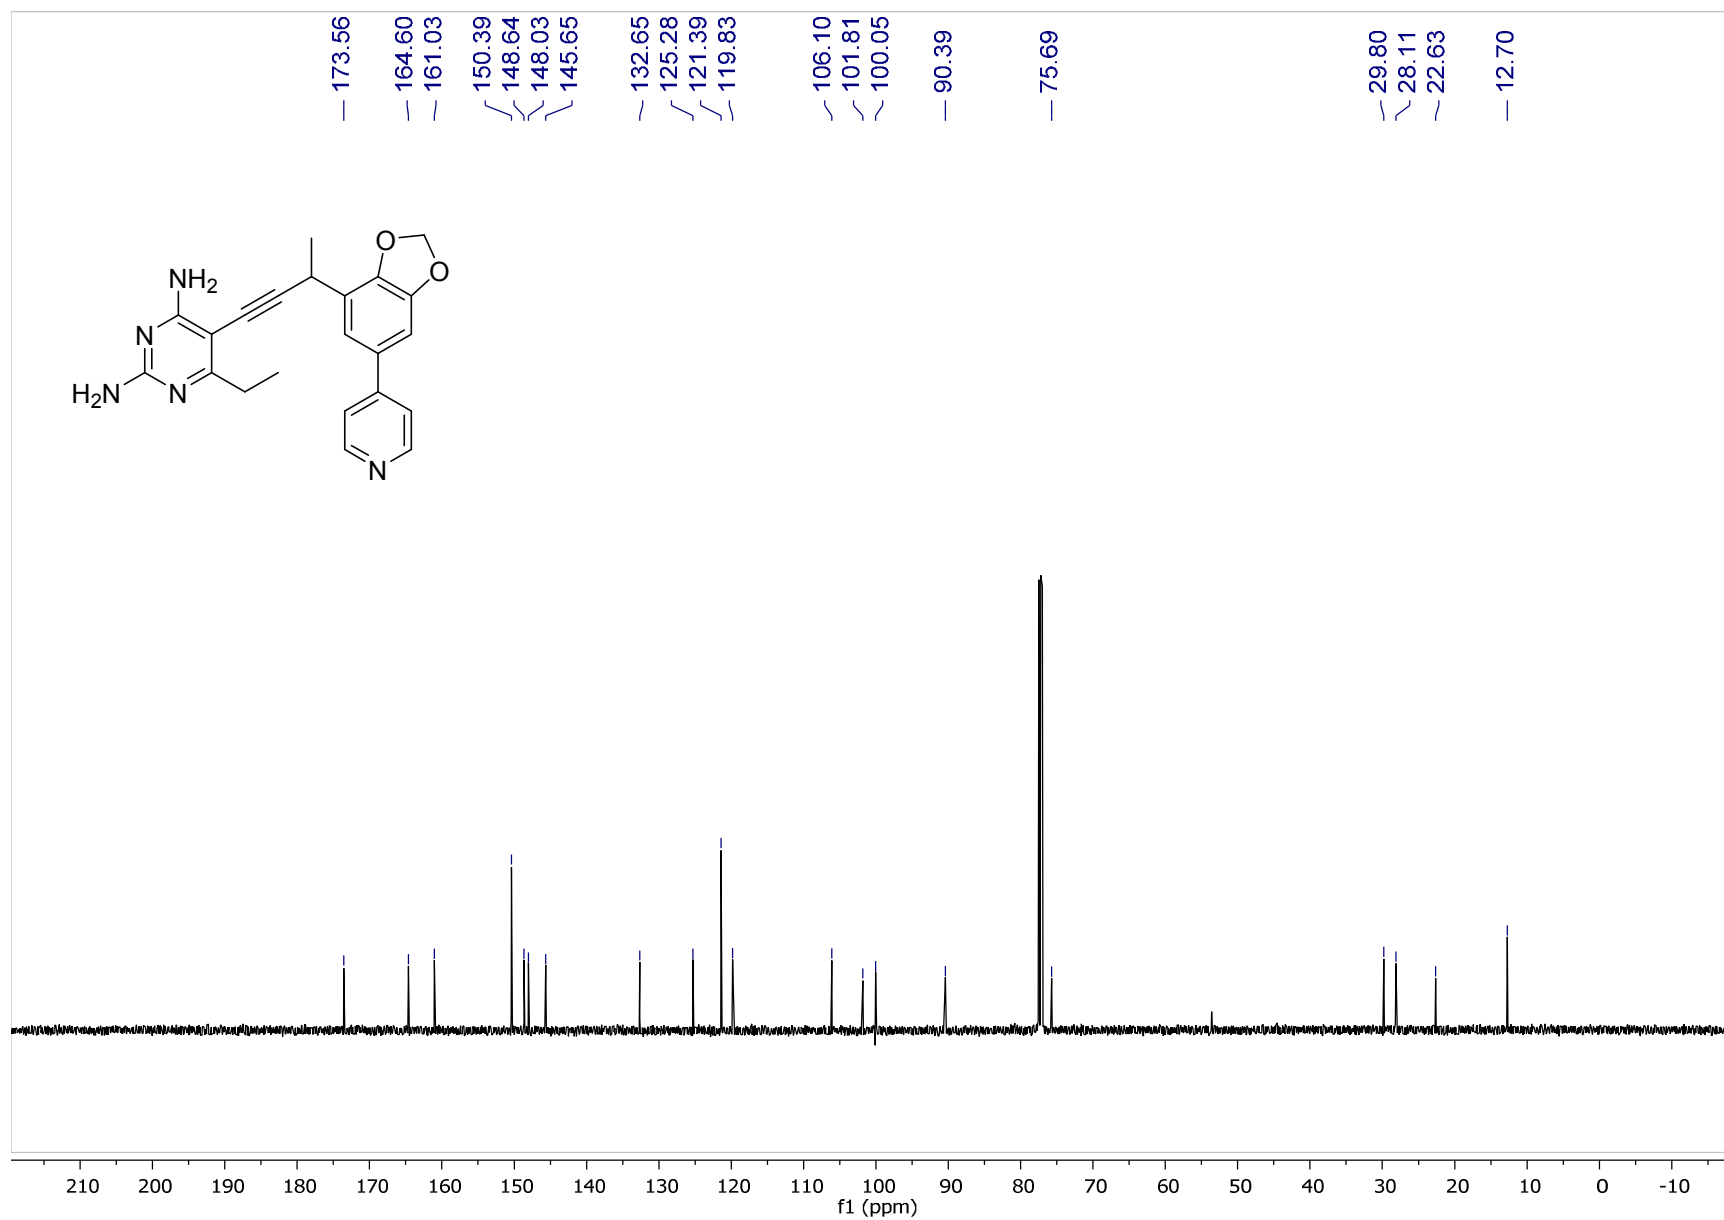

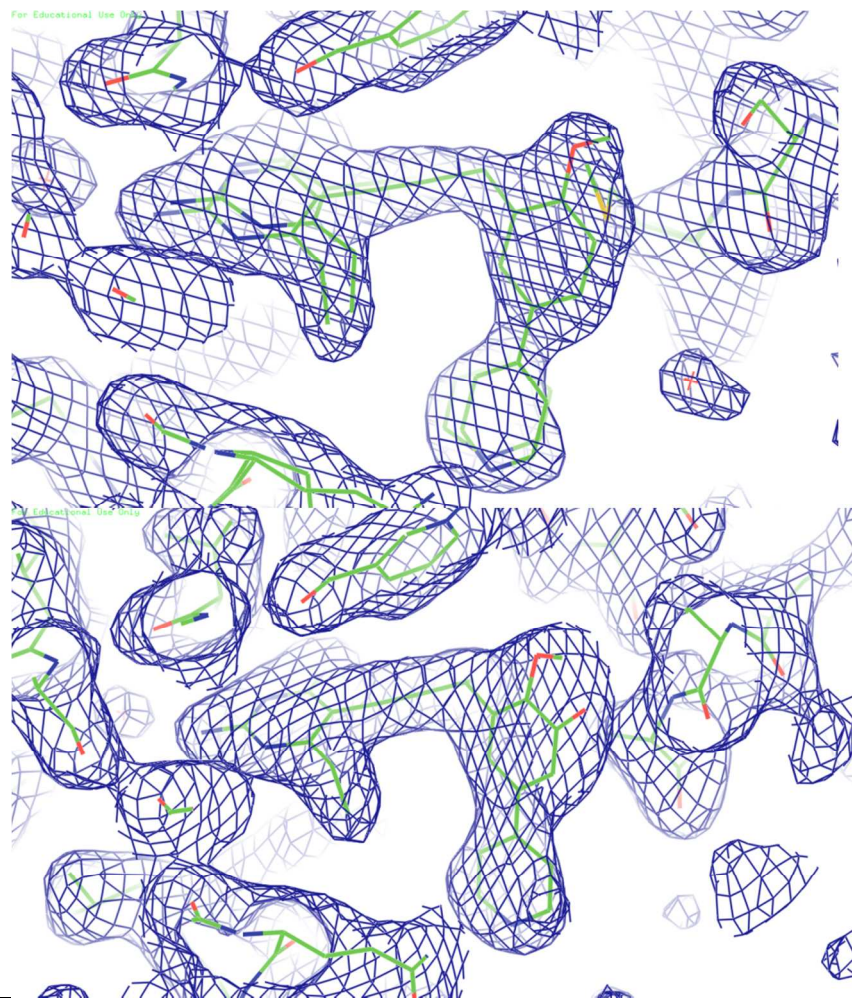

Figure S1. Simulated annealing omit electron density for the ligands: a) compound **3** and b) compound **17**.
